# Supplementary material
Source: PubMed Central journal article supplement (PMC4028165)
Supplement: Supp_Table2-4.pdf [file Supp_Table2-4.pdf]

SUPPLEMENTARY TABLE S2. FACTOR LOADINGS FOR DMN (ENTIRE SAMPLE)

|                       | <i>Factor 1</i> | <i>Factor 2</i> | <i>Factor 3</i> | <i>Factor 4</i> |
|-----------------------|-----------------|-----------------|-----------------|-----------------|
| DMNPCC.DMNRlatemp     | 0.660           | 0.432           | 0.081           | 0.070           |
| DMNLAG.DMNRlatemp     | 0.802           | 0.177           | 0.086           | 0.132           |
| DMNRAG.DMNRlatemp     | 0.730           | 0.217           | 0.014           | 0.138           |
| DMNPCC.DMNLlatemp     | 0.178           | 0.975           | 0.093           | 0.065           |
| DMNLAG.DMNLlatemp     | 0.363           | 0.544           | 0.090           | 0.139           |
| DMNPCC.DMNmPFC        | 0.065           | 0.156           | 0.715           | 0.185           |
| DMNmPFC.DMNLAG        | 0.129           | 0.053           | 0.757           | 0.197           |
| DMNmPFC.DMNRAG        | 0.146           | 0.047           | 0.628           | 0.308           |
| DMNPCC.DMNLAG         | 0.063           | 0.177           | 0.275           | 0.584           |
| DMNPCC.DMNRAG         | 0.084           | 0.079           | 0.165           | 0.751           |
| DMNLAG.DMNRAG         | 0.109           | 0.047           | 0.187           | 0.684           |
| DMNRAG.DMNLlatemp     | 0.332           | 0.510           | 0.041           | 0.248           |
| DMNmPFC.DMNLlatemp    | 0.241           | 0.368           | 0.277           | 0.017           |
| DMNmPFC.DMNRlatemp    | 0.513           | 0.158           | 0.210           | -0.052          |
| DMNLlatemp.DMNRlatemp | 0.219           | 0.041           | 0.159           | 0.119           |

Factors 1–4 explain 15.5%, 13.4%, 12.0%, and 11.2% of the variance, respectively (52.0% of the total variance).  
 Loadings >0.4 are shaded.

SUPPLEMENTARY TABLE S3. FACTOR LOADINGS FOR DAN (ENTIRE SAMPLE)

|                   | <i>Factor 1</i> | <i>Factor 2</i> | <i>Factor 3</i> | <i>Factor 4</i> |
|-------------------|-----------------|-----------------|-----------------|-----------------|
| DANLpIPS.DANRaIPS | 0.765           | 0.111           | 0.162           | 0.266           |
| DANLpIPS.DANLaIPS | 0.544           | 0.341           | 0.244           | 0.055           |
| DANRpIPS.DANRaIPS | 0.607           | 0.074           | 0.117           | 0.297           |
| DANRpIPS.DANLaIPS | 0.524           | 0.272           | 0.206           | 0.166           |
| DANRaIPS.DANLaIPS | 0.506           | -0.011          | 0.152           | 0.556           |
| DANLpIPS.DANLFEF  | 0.257           | 0.817           | 0.267           | 0.097           |
| DANLFEF.DANRpIPS  | 0.249           | 0.687           | 0.200           | 0.224           |
| DANLFEF.DANLaIPS  | 0.106           | 0.592           | 0.211           | 0.456           |
| DANRFEF.DANRaIPS  | 0.195           | 0.129           | 0.384           | 0.463           |
| DANRFEF.DANLaIPS  | 0.140           | 0.170           | 0.644           | 0.438           |
| DANLpIPS.DANRFEF  | 0.356           | 0.282           | 0.760           | 0.099           |
| DANLpIPS.DANRpIPS | 0.490           | 0.240           | 0.205           | 0.025           |
| DANLFEF.DANRFEF   | 0.130           | 0.239           | 0.373           | 0.454           |
| DANLFEF.DANRaIPS  | 0.246           | 0.309           | 0.114           | 0.677           |
| DANRpIPS.DANRFEF  | 0.276           | 0.248           | 0.661           | 0.184           |

Factors 1–4 explain 16.7%, 14.0%, 14.0%, and 12.5% of the variance, respectively (57.1% of the total variance). Loadings > 0.4 are shaded.

SUPPLEMENTARY TABLE S4. FACTOR LOADINGS FOR FPTC (ENTIRE SAMPLE)

|                           | <i>Factor 1</i> | <i>Factor 2</i> | <i>Factor 3</i> | <i>Factor 4</i> |
|---------------------------|-----------------|-----------------|-----------------|-----------------|
| FPTCLdIPFC.FPTCRIPL       | 0.474           | 0.072           | 0.319           | 0.249           |
| FPTCLfrontal.FPTCRIPL     | 0.489           | 0.035           | 0.345           | 0.235           |
| FPTCRIPL.FPTCLIPL         | 0.556           | 0.073           | 0.047           | 0.183           |
| FPTCRIPL.FPTCRIPS         | 0.592           | 0.096           | 0.083           | 0.082           |
| FPTCRIPL.FPTCLIPS         | 0.769           | 0.130           | 0.121           | 0.102           |
| FPTCLfrontal.FPTCLIPL     | 0.173           | 0.130           | 0.307           | 0.599           |
| FPTCLfrontal.FPTCRIPS     | 0.252           | 0.182           | 0.673           | 0.031           |
| FPTCLfrontal.FPTCLIPS     | 0.116           | 0.217           | 0.609           | 0.272           |
| FPTCLdIPFC.FPTCRfrontal   | 0.069           | 0.585           | 0.267           | 0.197           |
| FPTCRfrontal.FPTCLfrontal | 0.070           | 0.580           | 0.286           | 0.148           |
| FPTCRfrontal.FPTCLIPL     | 0.226           | 0.573           | -0.034          | 0.353           |
| FPTCRfrontal.FPTCRIPS     | 0.265           | 0.573           | 0.236           | -0.095          |
| FPTCRfrontal.FPTCLIPS     | 0.215           | 0.705           | 0.149           | 0.079           |
| FPTCRdIPFC.FPTCLdIPFC     | 0.099           | 0.338           | 0.353           | 0.298           |
| FPTCRdIPFC.FPTCLfrontal   | 0.124           | 0.363           | 0.395           | 0.281           |
| FPTCRdIPFC.FPTCRIPS       | 0.316           | 0.370           | 0.362           | -0.044          |
| FPTCRdIPFC.FPTCRfrontal   | 0.030           | 0.517           | 0.119           | 0.165           |
| FPTCRdIPFC.FPTCRIPL       | 0.495           | 0.245           | 0.153           | 0.133           |
| FPTCRdIPFC.FPTCLIPL       | 0.250           | 0.365           | 0.095           | 0.500           |
| FPTCRdIPFC.FPTCLIPS       | 0.261           | 0.452           | 0.326           | 0.218           |
| FPTCLdIPFC.FPTCLfrontal   | 0.034           | 0.174           | 0.454           | 0.294           |
| FPTCLdIPFC.FPTCLIPL       | 0.178           | 0.120           | 0.273           | 0.616           |
| FPTCLdIPFC.FPTCRIPS       | 0.284           | 0.205           | 0.657           | 0.078           |
| FPTCLdIPFC.FPTCLIPS       | 0.128           | 0.182           | 0.591           | 0.338           |
| FPTCRfrontal.FPTCRIPL     | 0.475           | 0.455           | 0.069           | 0.042           |
| FPTCLIPL.FPTCRIPS         | 0.492           | 0.177           | 0.143           | 0.243           |
| FPTCLIPL.FPTCLIPS         | 0.366           | 0.128           | 0.076           | 0.458           |
| FPTCRIPS.FPTCLIPS         | 0.473           | 0.248           | 0.348           | -0.070          |

Factors 1–4 explain 12.3%, 12.3%, 11.3%, and 7.8% of the variance, respectively (43.8% of the total variance). Loadings >0.4 are shaded.
