# Supplementary material
Source: PubMed Central journal article supplement (PMC4028165)
Supplement: Supp_Table5-7.pdf [file Supp_Table5-7.pdf]

SUPPLEMENTARY TABLE S5. FACTOR STRUCTURE OF DMN OBTAINED AFTER RANDOMLY SHUFFLING WINDOWS FOR EACH NODE

|                     | <i>Factor 1</i> | <i>Factor 2</i> | <i>Factor 3</i> | <i>Factor 4</i> |
|---------------------|-----------------|-----------------|-----------------|-----------------|
| DMNPCC.DMNRltemp    | 0.089           | 0.001           | 0.128           | 0.093           |
| DMNLAG.DMNRltemp    | 0.061           | 0.065           | -0.024          | 0.122           |
| DMNRAG.DMNRltemp    | 0.996           | 0.018           | 0.039           | 0.037           |
| DMNPCC.DMNLltemp    | -0.009          | -0.002          | 0.048           | 0.250           |
| DMNLAG.DMNLltemp    | 0.017           | 0.026           | 0.100           | 0.254           |
| DMNPCC.DMNmPFC      | 0.029           | 0.051           | 0.069           | 0.010           |
| DMNmPFC.DMNLAG      | -0.015          | 0.996           | 0.013           | 0.059           |
| DMNmPFC.DMNRAG      | -0.008          | 0.033           | 0.105           | -0.084          |
| DMNPCC.DMNLAG       | -0.062          | 0.076           | 0.218           | 0.009           |
| DMNPCC.DMNRAG       | 0.000           | -0.031          | 0.320           | -0.006          |
| DMNLAG.DMNRAG       | -0.018          | -0.004          | 0.096           | 0.028           |
| DMNRAG.DMNLltemp    | 0.071           | 0.016           | 0.200           | 0.071           |
| DMNmPFC.DMNLltemp   | -0.004          | -0.011          | 0.042           | 0.312           |
| DMNmPFC.DMNRltemp   | 0.027           | 0.023           | 0.176           | 0.043           |
| DMNLltemp.DMNRltemp | 0.015           | -0.034          | 0.147           | 0.015           |

Factors 1–4 account for 6.8%, 6.7%, 2.0%, and 1.8% of the variance, respectively (17.3% of the total variance). Loadings > 0.4 are shaded.

SUPPLEMENTARY TABLE S6. FACTOR STRUCTURE OF DAN OBTAINED AFTER RANDOMLY SHUFFLING WINDOWS FOR EACH NODE

|                   | <i>Factor 1</i> | <i>Factor 2</i> | <i>Factor 3</i> | <i>Factor 4</i> |
|-------------------|-----------------|-----------------|-----------------|-----------------|
| DANLpIPS.DANRaIPS | 0.037           | 0.095           | 0.030           | -0.195          |
| DANLpIPS.DANLaIPS | 0.046           | -0.008          | 0.293           | -0.226          |
| DANRpIPS.DANRaIPS | -0.012          | 0.149           | -0.002          | 0.062           |
| DANRpIPS.DANLaIPS | -0.031          | 0.060           | 0.076           | 0.200           |
| DANRaIPS.DANLaIPS | 0.053           | 0.597           | 0.036           | -0.113          |
| DANLpIPS.DANLFEF  | 0.116           | 0.054           | 0.063           | -0.030          |
| DANLFEF.DANRpIPS  | 0.051           | 0.015           | -0.024          | 0.137           |
| DANLFEF.DANLaIPS  | 0.778           | -0.047          | -0.116          | 0.048           |
| DANRFEF.DANRaIPS  | 0.051           | 0.070           | 0.083           | -0.030          |
| DANRFEF.DANLaIPS  | 0.086           | 0.126           | 0.270           | 0.105           |
| DANLpIPS.DANRFEF  | -0.009          | 0.002           | 0.228           | -0.007          |
| DANLpIPS.DANRpIPS | 0.008           | 0.001           | 0.158           | 0.022           |
| DANLFEF.DANRFEF   | 0.059           | 0.067           | 0.033           | 0.059           |
| DANLFEF.DANRaIPS  | 0.099           | -0.002          | 0.100           | 0.004           |
| DANRpIPS.DANRFEF  | -0.025          | 0.043           | 0.151           | 0.155           |

Factors 1–4 account for 4.4%, 2.8%, 2.0%, and 1.4% of the variance, respectively (10.6% of the total variance). Loadings >0.4 are shaded.

SUPPLEMENTARY TABLE S7. FACTOR STRUCTURE OF FPTC OBTAINED AFTER RANDOMLY SHUFFLING WINDOWS FOR EACH NODE

|                           | <i>Factor 1</i> | <i>Factor 2</i> | <i>Factor 3</i> | <i>Factor 4</i> |
|---------------------------|-----------------|-----------------|-----------------|-----------------|
| FPTCLdIPFC.FPTCRIPL       | 0.156           | -0.031          | -0.013          | 0.070           |
| FPTCLfrontal.FPTCRIPL     | 0.004           | -0.022          | 0.220           | 0.057           |
| FPTCRIPL.FPTCLIPL         | 0.112           | 0.219           | 0.114           | -0.030          |
| FPTCRIPL.FPTCRIPS         | 0.230           | 0.069           | -0.035          | 0.005           |
| FPTCRIPL.FPTCLIPS         | 0.125           | 0.144           | 0.121           | -0.021          |
| FPTCLfrontal.FPTCLIPL     | -0.024          | 0.065           | 0.152           | 0.042           |
| FPTCLfrontal.FPTCRIPS     | 0.027           | -0.064          | 0.258           | -0.056          |
| FPTCLfrontal.FPTCLIPS     | -0.084          | 0.017           | 0.215           | 0.025           |
| FPTCLdIPFC.FPTCRfrontal   | 0.089           | -0.049          | -0.175          | 0.122           |
| FPTCRfrontal.FPTCLfrontal | 0.060           | -0.178          | 0.166           | 0.359           |
| FPTCRfrontal.FPTCLIPL     | 0.029           | 0.151           | 0.001           | 0.229           |
| FPTCRfrontal.FPTCRIPS     | 0.210           | -0.103          | 0.071           | -0.031          |
| FPTCRfrontal.FPTCLIPS     | 0.081           | 0.095           | 0.027           | 0.136           |
| FPTCRdIPFC.FPTCLdIPFC     | 0.038           | 0.022           | -0.024          | -0.013          |
| FPTCRdIPFC.FPTCLfrontal   | -0.017          | -0.006          | 0.216           | 0.075           |
| FPTCRdIPFC.FPTCRIPS       | 0.294           | -0.013          | 0.087           | -0.061          |
| FPTCRdIPFC.FPTCRfrontal   | 0.107           | 0.016           | -0.015          | 0.027           |
| FPTCRdIPFC.FPTCRIPL       | 0.157           | 0.100           | -0.010          | -0.101          |
| FPTCRdIPFC.FPTCLIPL       | 0.029           | 0.183           | -0.044          | 0.110           |
| FPTCRdIPFC.FPTCLIPS       | 0.058           | 0.184           | 0.122           | 0.005           |
| FPTCLdIPFC.FPTCLfrontal   | -0.059          | 0.053           | 0.064           | 0.186           |
| FPTCLdIPFC.FPTCLIPL       | -0.027          | 0.127           | -0.053          | 0.021           |
| FPTCLdIPFC.FPTCRIPS       | 0.155           | 0.005           | -0.032          | 0.080           |
| FPTCLdIPFC.FPTCLIPS       | 0.015           | 0.013           | -0.002          | 0.108           |
| FPTCRfrontal.FPTCRIPL     | 0.241           | 0.031           | -0.034          | 0.021           |
| FPTCLIPL.FPTCRIPS         | 0.125           | 0.055           | -0.053          | 0.075           |
| FPTCLIPL.FPTCLIPS         | -0.021          | 0.363           | -0.016          | 0.067           |
| FPTCRIPS.FPTCLIPS         | 0.095           | -0.029          | 0.095           | -0.024          |

Factors 1–4 account for 1.5%, 1.4%, 1.3%, and 1.2% of the variance, respectively (5.4% of the total variance).
